# Supplementary material
Source: PubMed Central journal article supplement (PMC4338891)
Supplement: JVI.02716-14_zjv999090059so1.pdf [file JVI.02716-14_zjv999090059so1.pdf]

## Appendix 1 Primer sequences

| Primer                               | Sequence (5' - 3')               | PCR round       | Amplified LCV                |
|--------------------------------------|----------------------------------|-----------------|------------------------------|
| <b>generic PCR (LF2)</b>             |                                  |                 |                              |
| 3216-s                               | GTGATCCTAGCTTTCAAGTACAAYCCCTA    |                 |                              |
| 3219-as                              | AATTGTTGGCC(N/I)GGCTTCCA         | 1 <sup>st</sup> | All LCVs, except GgorLCV2    |
| 3217-s                               | GCTGGCC(N/I)GGCTTCCAYTC          |                 |                              |
| 3218-as                              | GCTGGCC(N/I)GGCTTCCAYTC          | 2 <sup>nd</sup> |                              |
| <b>generic PCR (BILF1)</b>           |                                  |                 |                              |
| 4176-s                               | TGACCCAGGTGGCCAACA               |                 |                              |
| 4176-as                              | ATAAAGTGGTTGAAGCTCCAG            | 1 <sup>st</sup> | GgorLCV2                     |
| 4177-s                               | ATCATAACAGCGCTTCCTCAG            |                 |                              |
| 4177-as                              | GAGCAGCGGCAGTGACAGCAT            | 2 <sup>nd</sup> |                              |
| 4141-s                               | TGCACATAATATGGAC(N/I)T(N/I)TGGCT |                 |                              |
| 4141-as                              | AGGCTGGGGAARTA(N/I)CG(N/I)GC     | 1 <sup>st</sup> | MfasLCV1, PpygLCV2, SsynLCV2 |
| 4142-s                               | ACGGTCTTCCAGCAC(N/I)TGGG(N/I)AT  |                 |                              |
| 4142-as                              | CTGCTCTGCACATGTTTRGG(N/I)CC      | 2 <sup>nd</sup> |                              |
| <b>Long-Distance PCR (BALF5-LF2)</b> |                                  |                 |                              |
| 3243-s                               | ATGCTGGAGCGGGCCAAG               |                 |                              |
| 3243-as                              | GCCTCGTAGGTGTTGTTGTATTCCA        | 1 <sup>st</sup> | PtroLCV1, GgorLCV1           |
| 3244-s                               | CCTTCGTGGAGGCCTGA                |                 |                              |
| 3244-as                              | TGTATTCCAGCTCCGTGATGAA           | 2 <sup>nd</sup> |                              |
| 3245-s                               | CGCTGAGACTGTCACGCTC              |                 |                              |
| 3245-as                              | TGGTTTTCAGGGTGGGAGA              | 1 <sup>st</sup> | ApanLCV1                     |
| 3246-s                               | GCTCCAGGGAAGAACCATG              |                 |                              |
| 3246-as                              | AGGACCAGGGAGGTAATCTTG            | 2 <sup>nd</sup> |                              |
| 3247-s                               | GTCTCACCATAGCCGAAACAG            |                 |                              |
| 3247-as                              | GGATGGGACAGAATAAGGGAT            | 1 <sup>st</sup> | PpitLCV1                     |
| 3248-s                               | GCCGAAACAGTACTCTACAGG            |                 |                              |
| 3248-as                              | TTTGTGCTCAGAGGAGTTTCGT           | 2 <sup>nd</sup> |                              |
| 3313-s                               | GCCGAGACCGTGACGCTG               |                 |                              |
| 3313-as                              | CGCTGTAATTTTGGAACTGAGGG          | 1 <sup>st</sup> | EpatLCV1                     |
| 3314-s                               | CGCACGATGCTGGAACGA               |                 |                              |
| 3314-as                              | GGGAGCCTCATAGGTGTTGTTG           | 2 <sup>nd</sup> |                              |
| 3317-s                               | CGAGACAGTGACGCTACAGGG            |                 |                              |
| 3317-as                              | TTGGCGGAATGGGACATG               | 1 <sup>st</sup> | PbadLCV1                     |
| 3318-s                               | TTTGTCGAGGCACTGAGGC              |                 |                              |
| 3318-as                              | CCGTGATGAAATTGGGAGG              | 2 <sup>nd</sup> |                              |
| 3916-s                               | CAGGGGCGGACGATGCTG               |                 |                              |
| 3916-as                              | ACCTTCCCAGGGAATGTG               | 1 <sup>st</sup> | PpygLCV1                     |
| 3917-s                               | CGATAGCCGAGACTGTGACCC            |                 |                              |
| 3917-as                              | TTGCCACGCCGTATAGCATT             | 2 <sup>nd</sup> |                              |
| 3519-s                               | CTGCAGGCACTGGCCCCCTCAG           |                 |                              |
| 3519-as                              | TGATCTTTGAACTAAGTGGTGCT          | 1 <sup>st</sup> | HsynLCV1                     |
| 3520-s                               | TCAGCCCAGCTCCTGGATTCT            |                 |                              |
| 3520-as                              | TGAACTAAGTGGTGCTTCAAAG           | 2 <sup>nd</sup> |                              |
